# Supplementary material
Source: PubMed Central journal article supplement (PMC1356323)
Supplement: 7600882s1.pdf [file 7600882s1.pdf]

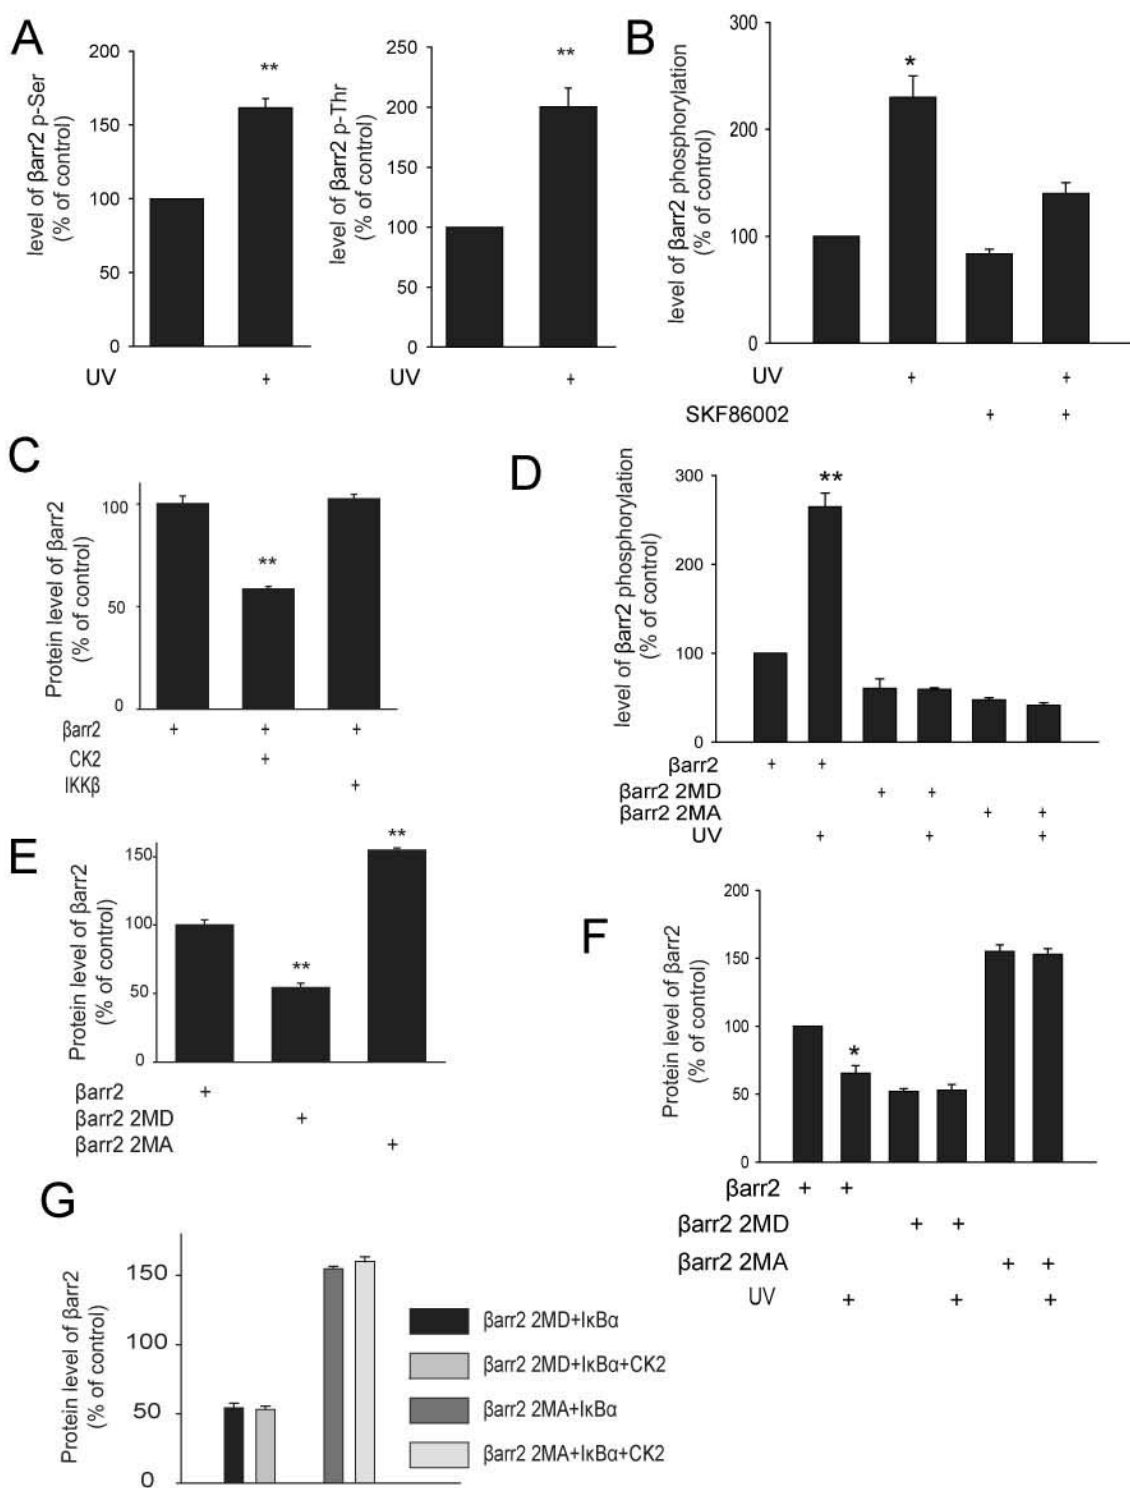

Supplemental Figure 1

(A) Quantitation of Figure 3A

(B) Quantitation of Figure 3B

(C) Quantitation of Figure 3C

(D) Quantitation of Figure 3F

(E) Quantitation of Figure 3G

(F) Quantitation of Figure 3D and 3H

(G) Quantitation of Figure 3I
