# Supplementary material
Source: PubMed Central journal article supplement (PMC1356323)
Supplement: 7600882s2.pdf [file 7600882s2.pdf]

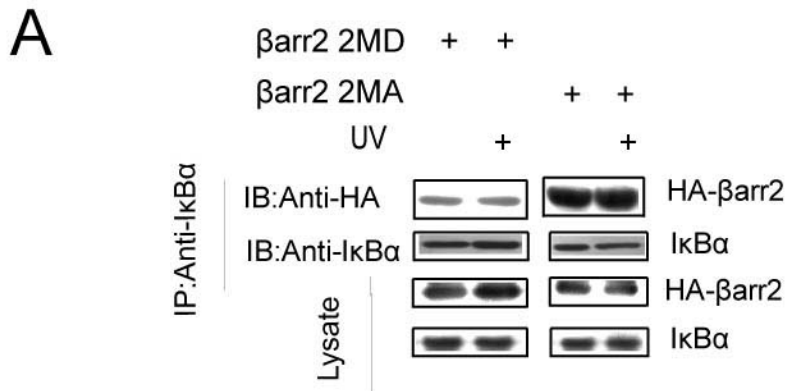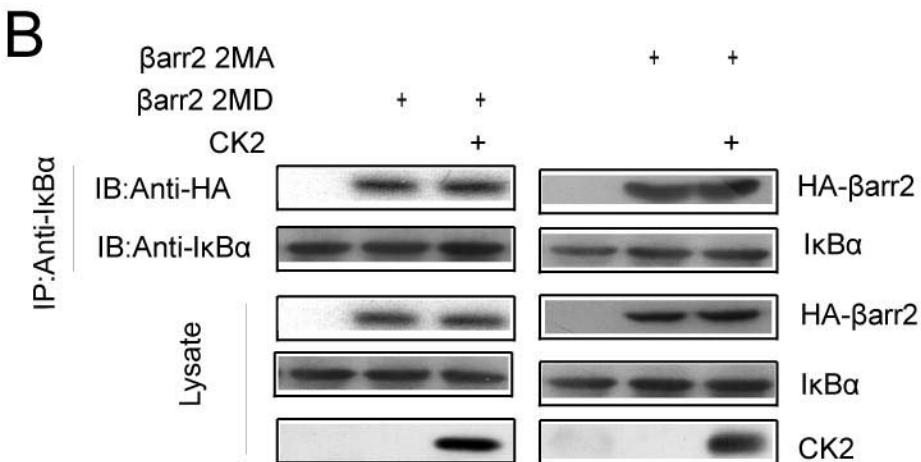

Supplemental Figure 2

(A-B) No UV irradiation (A) and CK2 (B) blockage on the interaction of IκBα with β-arrestin2 2MD or β-arrestin2 2MA. Assay was done as in (Figure 3C and 3D). 10μM MG132 for 4 hr was also used to inhibit IκBα degradation.
