# Supplementary material
Source: PubMed Central journal article supplement (PMC1356323)
Supplement: 7600882s3.pdf [file 7600882s3.pdf]

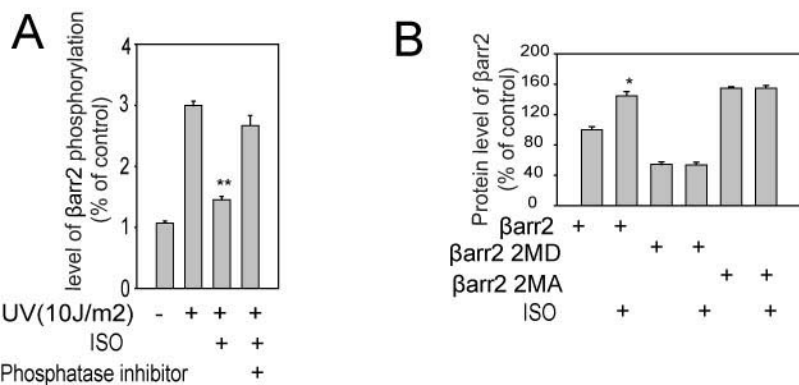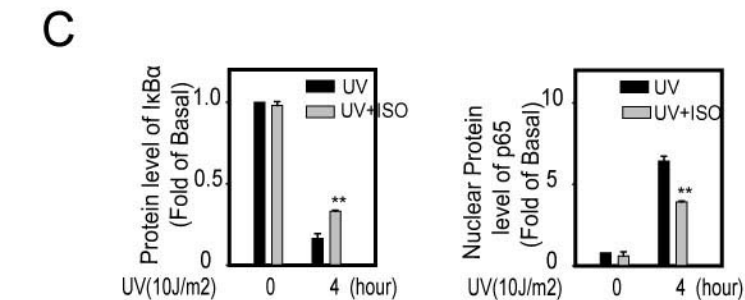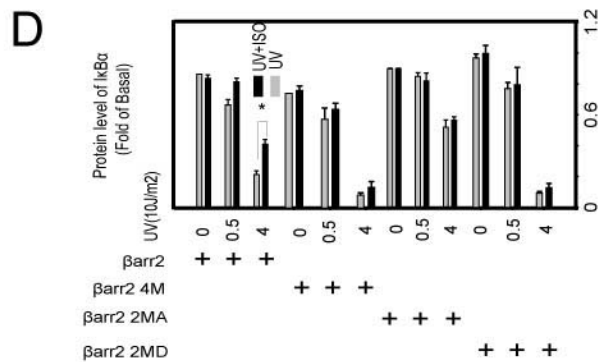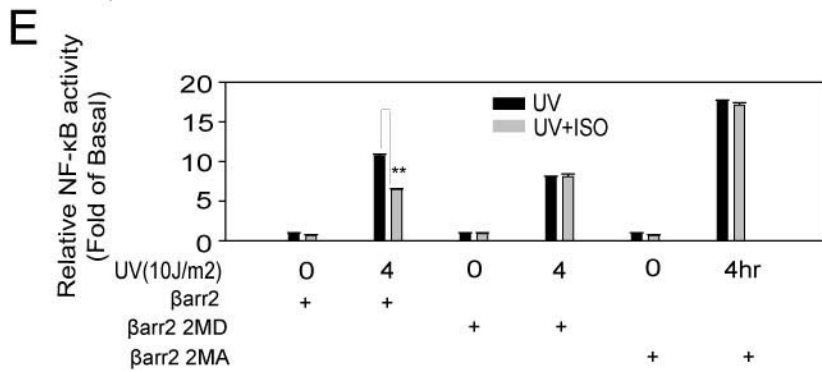

Supplemental Figure 3

(A) Quantitation of Figure 5A

(B) Quantitation of Figure 5B

(C) Quantitation of Figure 5C

(D) Quantitation of Figure 5D

(E) Quantitation of Figure 5E
