# Supplementary material
Source: PubMed Central journal article supplement (PMC1356323)
Supplement: 7600882s4.pdf [file 7600882s4.pdf]

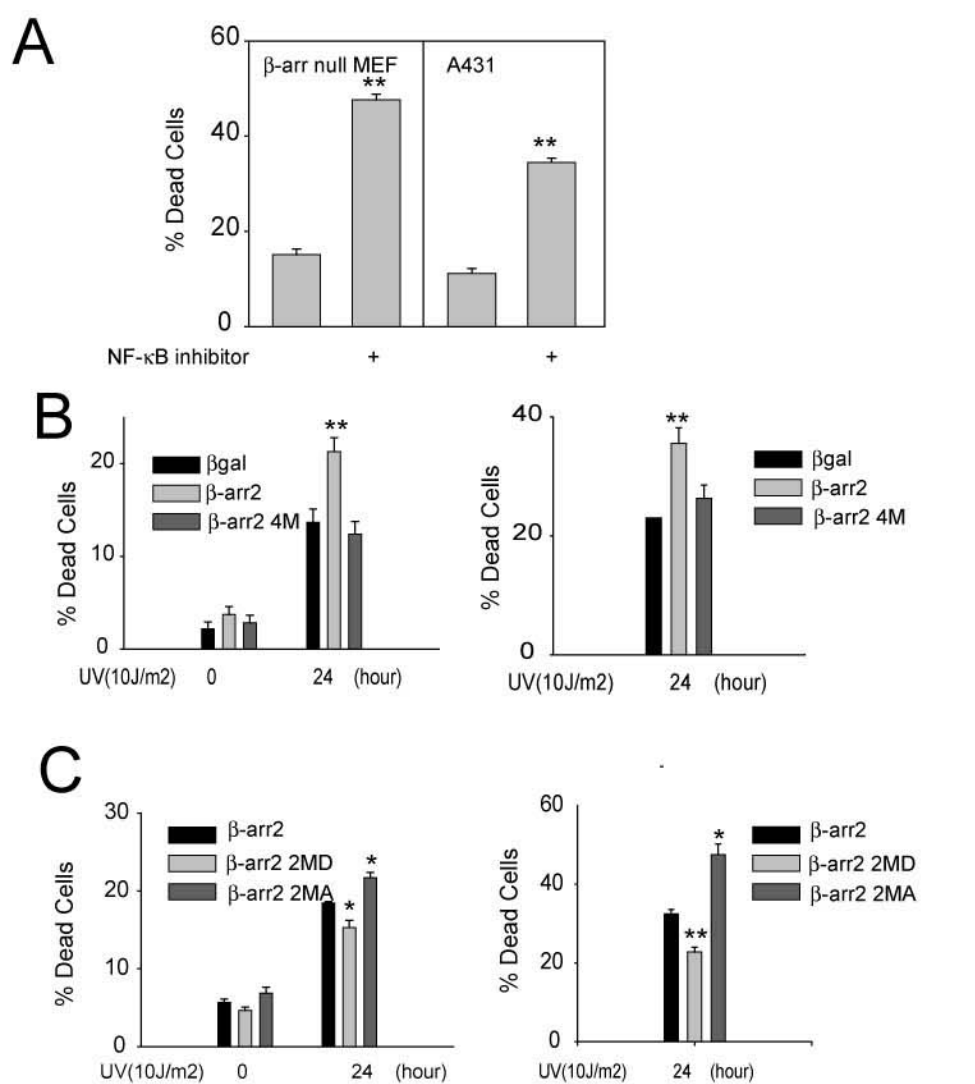

Supplemental Figure 4

(A) NF-κB activation inhibited UV-induced cell death. A431 cells and β-arrestin-null MEF cells treated with or without 100nM NF-κB activation inhibitor were exposed to UV irradiation for 24 hr, and cell death was measured using FACS assay.

(B-C) P53-null Saos2 cells expressed with β-arrestin2, β-arrestin2 4M (B), β-arrestin2 2MD (C), or β-arrestin2 2MA (C) were exposed to UV irradiation for indicated times, and cell death was measured using MTT and FACS assay.
