# Supplementary material
Source: PubMed Central journal article supplement (PMC1356323)
Supplement: 7600882s5.pdf [file 7600882s5.pdf]

**A**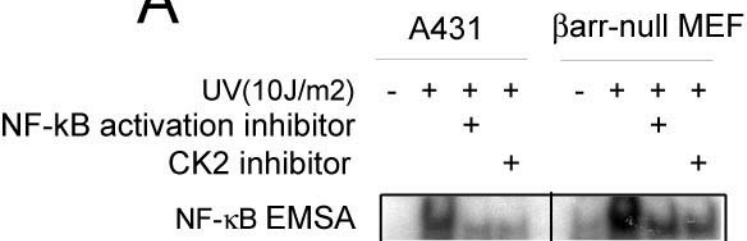**B**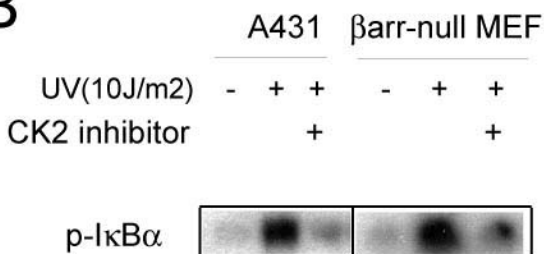

Supplemental Figure 5

(A) CK2 involvement of UV-induced NF- $\kappa$ B activation in both A431 cells and  $\beta$ -arrestin-null MEF cells. A431 cells and  $\beta$ -arrestin-null MEF cells treated with 100nM NF- $\kappa$ B activation inhibitor or 40nM CK2 inhibitor for 30 min or not were irradiated with UV. After 4 hr, nuclear extracts of the cells were separated to examine the NF- $\kappa$ B DNA binding activity by EMSA.

(B) CK2 was induced by UV irradiation in A431 cells and  $\beta$ -arrestin-null MEF cells. A431 cells and  $\beta$ -arrestin-null MEF cells were exposed to UV irradiation with or without CK2 inhibitor and phosphorylation of I $\kappa$ B $\alpha$  was measured using *in vivo* phosphorylation.
